# Supplementary material for: Macrophage-Colony-Stimulating Factor Receptor Enhances Prostate Cancer Cell Growth and Aggressiveness In Vitro and In Vivo and Increases Osteopontin Expression
Source: MDPI journal article supplement (doi:10.3390/ijms232416028), 2022-12-16
Supplement: s1 [file s1]

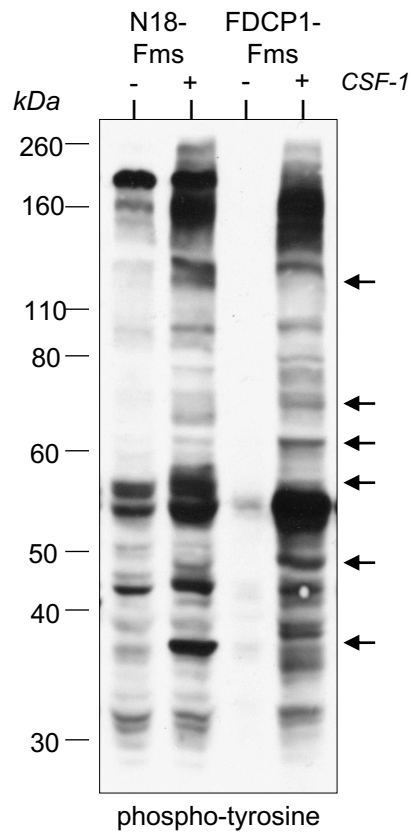

**Supplementary Figure S1:** Stimulation by CSF-1 of CSF-1R-expressing cells. Immunoblot analysis of protein tyrosine phosphorylation patterns shows differences (arrows) between stimulated myeloid FDCP1-Fms cells and prostate cancer N18-Fms cells.
