# Supplementary material for: Macrophage-Colony-Stimulating Factor Receptor Enhances Prostate Cancer Cell Growth and Aggressiveness In Vitro and In Vivo and Increases Osteopontin Expression
Source: MDPI journal article supplement (doi:10.3390/ijms232416028), 2022-12-16
Supplement: s1 [file s1]

**A**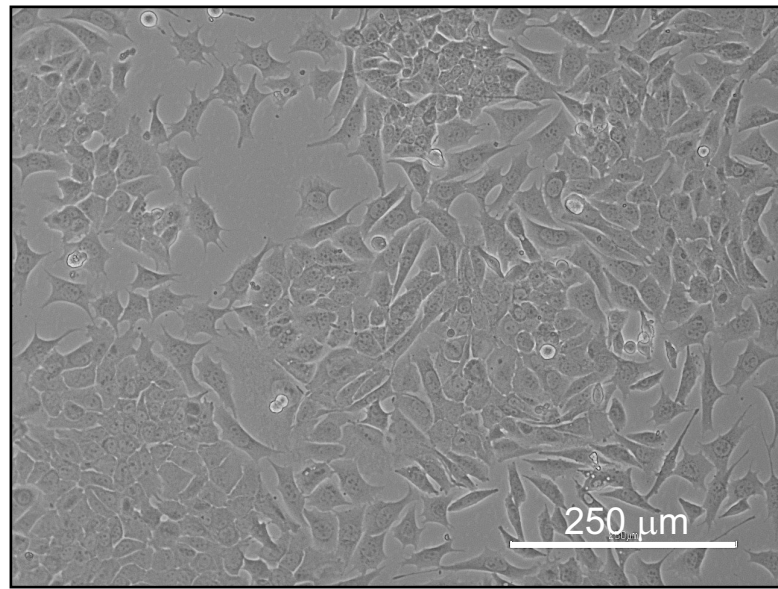**B**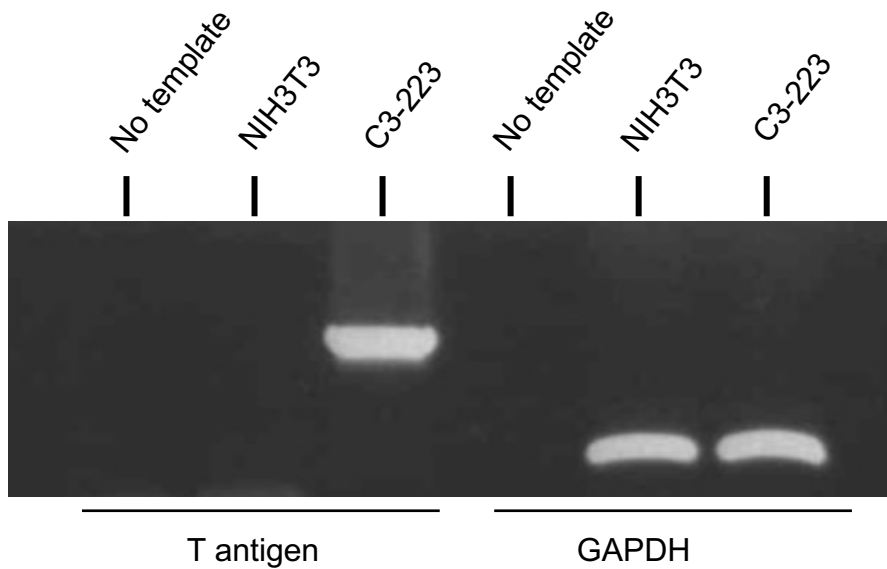

**Supplementary Figure S2: C3-223 mammary cancer cell line.**

(A) Representative photograph of murine C3-223 mammary cancer cell line, scale bar, 250μm. (B) T-antigen expression was analysed by a single PCR on genomic DNA extracted from murine C3-223 mammary cancer cell line and murine fibroblast NIH 3T3 cell line (as a negative control) with the primer set TA1/TA2 :

(GACCTGTGGCTGAGTTTGCTCA) / (GCTTTATTTGTAACCATTATAAG). GAPDH expression was used as a control of the quality of genomic DNA extraction.
