# Supplementary material for: Macrophage-Colony-Stimulating Factor Receptor Enhances Prostate Cancer Cell Growth and Aggressiveness In Vitro and In Vivo and Increases Osteopontin Expression
Source: Int J Mol Sci. 2022 Dec 16;23(24):16028. doi: 10.3390/ijms232416028 (PMC9785574; doi:10.3390/ijms232416028)
Supplement: Supplementary file 1 [file ijms-23-16028-s001.zip › TABLE S1 GO and reactome analysis data mougel et al.xls]

## Sheet: GO Bio Proc UP
Analysis Type:	PANTHER Overrepresentation Test (Released 20210224)
Annotation Version and Release Date:	GO Ontology database DOI: 10,5281/zenodo,4735677 Released 2021-05-01
Analyzed List:	upload_1 (Homo sapiens)
Reference List:	Homo sapiens (all genes in database)
Test Type:	FISHER
Correction:	FDR
GO biological process complete	Homo sapiens - REFLIST (20595)	upload_1 (409)	upload_1 (expected)	upload_1 (over/under)	upload_1 (fold Enrichment)	upload_1 (raw P-value)	upload_1 (FDR)
positive regulation of interferon-gamma-mediated signaling pathway (GO:0060335)	6	3	0.12	+	25.18	0.000564	0.0209
positive regulation of response to interferon-gamma (GO:0060332)	6	3	0.12	+	25.18	0.000564	0.0209
cobalt ion transport (GO:0006824)	6	3	0.12	+	25.18	0.000564	0.0208
ISG15-protein conjugation (GO:0032020)	6	3	0.12	+	25.18	0.000564	0.0208
detection of virus (GO:0009597)	6	3	0.12	+	25.18	0.000564	0.0207
regulation of CD8-positive, alpha-beta T cell differentiation (GO:0043376)	7	3	0.14	+	21.58	0.000794	0.028
smooth muscle cell migration (GO:0014909)	10	4	0.2	+	20.14	0.000121	0.00607
growth hormone receptor signaling pathway via JAK-STAT (GO:0060397)	8	3	0.16	+	18.88	0.00108	0.036
regulation of CD8-positive, alpha-beta T cell activation (GO:2001185)	19	7	0.38	+	18.55	4.82e-07	5.58e-05
facial nerve morphogenesis (GO:0021610)	11	4	0.22	+	18.31	0.000163	0.00771
facial nerve development (GO:0021561)	11	4	0.22	+	18.31	0.000163	0.00769
antigen processing and presentation of endogenous peptide antigen via MHC class I (GO:0019885)	17	6	0.34	+	17.77	4.01e-06	0.000339
protein mono-ADP-ribosylation (GO:0140289)	12	4	0.24	+	16.78	0.000214	0.00974
facial nerve structural organization (GO:0021612)	9	3	0.18	+	16.78	0.00141	0.045
positive regulation of CD8-positive, alpha-beta T cell activation (GO:2001187)	9	3	0.18	+	16.78	0.00141	0.0449
response to interferon-beta (GO:0035456)	33	11	0.66	+	16.78	5.75e-10	1.06e-07
dichotomous subdivision of an epithelial terminal unit (GO:0060600)	9	3	0.18	+	16.78	0.00141	0.0448
cellular response to type I interferon (GO:0071357)	22	7	0.44	+	16.02	1.09e-06	0.000108
antigen processing and presentation of endogenous peptide antigen (GO:0002483)	19	6	0.38	+	15.9	6.8e-06	0.00053
positive regulation of epidermal growth factor-activated receptor activity (GO:0045741)	13	4	0.26	+	15.49	0.000276	0.0117
type I interferon signaling pathway (GO:0060337)	20	6	0.4	+	15.11	8.7e-06	0.000658
response to type I interferon (GO:0034340)	30	9	0.6	+	15.11	4.66e-08	6.11e-06
regulation of interferon-gamma-mediated signaling pathway (GO:0060334)	17	5	0.34	+	14.81	5.47e-05	0.00305
regulation of response to interferon-gamma (GO:0060330)	17	5	0.34	+	14.81	5.47e-05	0.00304
response to interferon-alpha (GO:0035455)	24	7	0.48	+	14.69	1.77e-06	0.00017
growth hormone receptor signaling pathway (GO:0060396)	18	5	0.36	+	13.99	6.88e-05	0.00372
antiviral innate immune response (GO:0140374)	15	4	0.3	+	13.43	0.000435	0.0168
regulation of dendritic cell cytokine production (GO:0002730)	15	4	0.3	+	13.43	0.000435	0.0168
negative regulation of type I interferon-mediated signaling pathway (GO:0060339)	19	5	0.38	+	13.25	8.56e-05	0.0045
cellular response to interferon-beta (GO:0035458)	24	6	0.48	+	12.59	2.1e-05	0.00138
preganglionic parasympathetic fiber development (GO:0021783)	16	4	0.32	+	12.59	0.000536	0.02
antigen processing and presentation of peptide antigen via MHC class I (GO:0002474)	28	7	0.56	+	12.59	4.23e-06	0.000353
cellular response to growth hormone stimulus (GO:0071378)	20	5	0.4	+	12.59	0.000105	0.00541
receptor signaling pathway via JAK-STAT (GO:0007259)	41	10	0.81	+	12.28	4.4e-08	5.82e-06
response to vitamin D (GO:0033280)	29	7	0.58	+	12.15	5.17e-06	0.000419
receptor signaling pathway via STAT (GO:0097696)	42	10	0.83	+	11.99	5.36e-08	6.97e-06
branch elongation of an epithelium (GO:0060602)	17	4	0.34	+	11.85	0.000652	0.0234
regulation of epidermal growth factor-activated receptor activity (GO:0007176)	30	7	0.6	+	11.75	6.27e-06	0.000493
antigen processing and presentation of endogenous antigen (GO:0019883)	26	6	0.52	+	11.62	3.1e-05	0.00191
negative regulation of viral life cycle (GO:1903901)	27	6	0.54	+	11.19	3.73e-05	0.00221
parasympathetic nervous system development (GO:0048486)	18	4	0.36	+	11.19	0.000785	0.0277
regulation of axon extension involved in axon guidance (GO:0048841)	32	7	0.64	+	11.02	9.06e-06	0.000679
negative regulation of viral entry into host cell (GO:0046597)	23	5	0.46	+	10.95	0.000186	0.00859
negative regulation of receptor signaling pathway via JAK-STAT (GO:0046426)	23	5	0.46	+	10.95	0.000186	0.00856
negative regulation of viral genome replication (GO:0045071)	56	12	1.11	+	10.79	6.89e-09	1.06e-06
macrophage activation involved in immune response (GO:0002281)	19	4	0.38	+	10.6	0.000935	0.032
fibrinolysis (GO:0042730)	19	4	0.38	+	10.6	0.000935	0.0319
defense response to protozoan (GO:0042832)	24	5	0.48	+	10.49	0.000221	0.00989
regulation of type I interferon-mediated signaling pathway (GO:0060338)	35	7	0.7	+	10.07	1.51e-05	0.00104
response to protozoan (GO:0001562)	25	5	0.5	+	10.07	0.000261	0.0112
negative regulation of receptor signaling pathway via STAT (GO:1904893)	25	5	0.5	+	10.07	0.000261	0.0111
activation of phospholipase C activity (GO:0007202)	30	6	0.6	+	10.07	6.24e-05	0.00342
negative chemotaxis (GO:0050919)	46	9	0.91	+	9.85	1.06e-06	0.000106
positive regulation of interferon-beta production (GO:0032728)	41	8	0.81	+	9.83	4.33e-06	0.000357
viral protein processing (GO:0019082)	31	6	0.62	+	9.75	7.33e-05	0.00394
negative regulation of axon extension involved in axon guidance (GO:0048843)	26	5	0.52	+	9.68	0.000306	0.0127
regulation of endothelial cell chemotaxis (GO:2001026)	21	4	0.42	+	9.59	0.0013	0.042
negative regulation of ERBB signaling pathway (GO:1901185)	32	6	0.64	+	9.44	8.56e-05	0.00449
semaphorin-plexin signaling pathway (GO:0071526)	38	7	0.75	+	9.28	2.42e-05	0.00156
negative regulation of epidermal growth factor receptor signaling pathway (GO:0042059)	28	5	0.56	+	8.99	0.000414	0.0162
negative regulation of viral process (GO:0048525)	96	17	1.91	+	8.92	6.86e-11	1.5e-08
regulation of platelet activation (GO:0010543)	41	7	0.81	+	8.6	3.73e-05	0.0022
macrophage activation (GO:0042116)	54	9	1.07	+	8.39	3.44e-06	0.000301
regulation of interferon-alpha production (GO:0032647)	30	5	0.6	+	8.39	0.000548	0.0204
regulation of viral genome replication (GO:0045069)	85	14	1.69	+	8.29	7.64e-09	1.16e-06
negative regulation of protein tyrosine kinase activity (GO:0061099)	31	5	0.62	+	8.12	0.000626	0.0227
regulation of interferon-beta production (GO:0032648)	57	9	1.13	+	7.95	5.12e-06	0.000417
response to growth hormone (GO:0060416)	33	5	0.66	+	7.63	0.000808	0.0282
antigen processing and presentation of peptide antigen (GO:0048002)	60	9	1.19	+	7.55	7.44e-06	0.000574
positive regulation of phospholipase C activity (GO:0010863)	40	6	0.79	+	7.55	0.000255	0.011
defense response to symbiont (GO:0140546)	214	32	4.25	+	7.53	1.84e-17	1.71e-14
defense response to virus (GO:0051607)	214	32	4.25	+	7.53	1.84e-17	1.61e-14
negative regulation of peptidyl-tyrosine phosphorylation (GO:0050732)	54	8	1.07	+	7.46	2.6e-05	0.00163
positive regulation of epidermal growth factor receptor signaling pathway (GO:0045742)	35	5	0.7	+	7.19	0.00103	0.0346
regulation of ERBB signaling pathway (GO:1901184)	77	11	1.53	+	7.19	1.11e-06	0.00011
regulation of phospholipase C activity (GO:1900274)	42	6	0.83	+	7.19	0.000323	0.0133
regulation of epidermal growth factor receptor signaling pathway (GO:0042058)	71	10	1.41	+	7.09	3.85e-06	0.000328
positive regulation of response to cytokine stimulus (GO:0060760)	57	8	1.13	+	7.07	3.69e-05	0.00219
positive regulation of cytokine-mediated signaling pathway (GO:0001961)	50	7	0.99	+	7.05	0.000115	0.00583
negative regulation of coagulation (GO:0050819)	50	7	0.99	+	7.05	0.000115	0.00581
negative regulation of alpha-beta T cell activation (GO:0046636)	43	6	0.85	+	7.03	0.000362	0.0145
cell-substrate junction assembly (GO:0007044)	36	5	0.71	+	6.99	0.00115	0.0379
regulation of phosphatidylinositol 3-kinase activity (GO:0043551)	58	8	1.15	+	6.95	4.13e-05	0.00237
negative regulation of epithelial cell differentiation (GO:0030857)	44	6	0.87	+	6.87	0.000405	0.0159
regulation of viral entry into host cell (GO:0046596)	44	6	0.87	+	6.87	0.000405	0.0159
positive regulation of type I interferon production (GO:0032481)	59	8	1.17	+	6.83	4.61e-05	0.00263
positive regulation of ERBB signaling pathway (GO:1901186)	37	5	0.73	+	6.8	0.00128	0.0419
cell-substrate junction organization (GO:0150115)	37	5	0.73	+	6.8	0.00128	0.0419
negative regulation of T cell differentiation (GO:0045581)	46	6	0.91	+	6.57	0.000502	0.0192
regulation of bone resorption (GO:0045124)	46	6	0.91	+	6.57	0.000502	0.0191
positive regulation of signaling receptor activity (GO:2000273)	46	6	0.91	+	6.57	0.000502	0.0191
negative regulation of blood coagulation (GO:0030195)	46	6	0.91	+	6.57	0.000502	0.019
negative regulation of innate immune response (GO:0045824)	70	9	1.39	+	6.47	2.28e-05	0.00149
regulation of collagen biosynthetic process (GO:0032965)	39	5	0.77	+	6.46	0.00159	0.0489
negative regulation of production of molecular mediator of immune response (GO:0002701)	39	5	0.77	+	6.46	0.00159	0.0488
negative regulation of hemostasis (GO:1900047)	47	6	0.93	+	6.43	0.000557	0.0207
tissue regeneration (GO:0042246)	63	8	1.25	+	6.39	7.03e-05	0.00379
regulation of coagulation (GO:0050818)	71	9	1.41	+	6.38	2.52e-05	0.00161
epidermal growth factor receptor signaling pathway (GO:0007173)	48	6	0.95	+	6.29	0.000616	0.0224
cellular response to virus (GO:0098586)	56	7	1.11	+	6.29	0.000218	0.00984
phosphatidylinositol phosphate biosynthetic process (GO:0046854)	64	8	1.27	+	6.29	7.78e-05	0.00414
ERBB signaling pathway (GO:0038127)	57	7	1.13	+	6.18	0.000241	0.0106
regulation of viral life cycle (GO:1903900)	148	18	2.94	+	6.12	4.41e-09	7.23e-07
regulation of innate immune response (GO:0045088)	214	26	4.25	+	6.12	1.57e-12	4.35e-10
regulation of blood coagulation (GO:0030193)	66	8	1.31	+	6.1	9.47e-05	0.0049
negative regulation of chemotaxis (GO:0050922)	58	7	1.15	+	6.08	0.000266	0.0113
regulation of viral process (GO:0050792)	166	20	3.3	+	6.07	7.03e-10	1.27e-07
response to virus (GO:0009615)	316	38	6.28	+	6.06	1.23e-17	1.29e-14
negative regulation of cytokine-mediated signaling pathway (GO:0001960)	67	8	1.33	+	6.01	0.000104	0.00538
regulation of receptor signaling pathway via STAT (GO:1904892)	76	9	1.51	+	5.96	4.11e-05	0.00238
positive regulation of innate immune response (GO:0045089)	127	15	2.52	+	5.95	1.23e-07	1.53e-05
modulation by symbiont of entry into host (GO:0052372)	51	6	1.01	+	5.92	0.000825	0.0288
regulation of hemostasis (GO:1900046)	68	8	1.35	+	5.92	0.000115	0.00582
regulation of type I interferon production (GO:0032479)	94	11	1.87	+	5.89	6.45e-06	0.000505
regulation of receptor signaling pathway via JAK-STAT (GO:0046425)	69	8	1.37	+	5.84	0.000126	0.00624
response to interferon-gamma (GO:0034341)	130	15	2.58	+	5.81	1.62e-07	1.99e-05
viral gene expression (GO:0019080)	52	6	1.03	+	5.81	0.000905	0.0312
regulation of lipid kinase activity (GO:0043550)	70	8	1.39	+	5.75	0.000138	0.00677
cranial nerve development (GO:0021545)	53	6	1.05	+	5.7	0.000991	0.0337
regulation of bone remodeling (GO:0046850)	53	6	1.05	+	5.7	0.000991	0.0336
negative regulation of response to cytokine stimulus (GO:0060761)	71	8	1.41	+	5.67	0.000151	0.00723
integrin-mediated signaling pathway (GO:0007229)	98	11	1.95	+	5.65	9.27e-06	0.000688
negative regulation of lymphocyte differentiation (GO:0045620)	54	6	1.07	+	5.59	0.00108	0.0362
regulation of protein tyrosine kinase activity (GO:0061097)	90	10	1.79	+	5.59	2.56e-05	0.00163
regulation of cytokine-mediated signaling pathway (GO:0001959)	136	15	2.7	+	5.55	2.76e-07	3.24e-05
regulation of response to cytokine stimulus (GO:0060759)	147	16	2.92	+	5.48	1.3e-07	1.61e-05
positive regulation of response to biotic stimulus (GO:0002833)	167	18	3.32	+	5.43	2.45e-08	3.38e-06
positive regulation of phospholipase activity (GO:0010518)	56	6	1.11	+	5.4	0.00129	0.0419
antigen processing and presentation (GO:0019882)	94	10	1.87	+	5.36	3.6e-05	0.00215
regulation of tissue remodeling (GO:0034103)	76	8	1.51	+	5.3	0.000231	0.0103
regulation of stem cell differentiation (GO:2000736)	57	6	1.13	+	5.3	0.0014	0.0449
regulation of interleukin-10 production (GO:0032653)	57	6	1.13	+	5.3	0.0014	0.0448
myeloid leukocyte activation (GO:0002274)	134	14	2.66	+	5.26	1.25e-06	0.000122
negative regulation of developmental growth (GO:0048640)	106	11	2.11	+	5.23	1.82e-05	0.00124
regulation of cytokine production involved in immune response (GO:0002718)	98	10	1.95	+	5.14	4.98e-05	0.00281
negative regulation of T cell activation (GO:0050868)	121	12	2.4	+	4.99	1.16e-05	0.000837
cellular response to mechanical stimulus (GO:0071260)	83	8	1.65	+	4.85	0.000401	0.0159
regulation of alpha-beta T cell activation (GO:0046634)	104	10	2.07	+	4.84	7.9e-05	0.00418
regulation of response to biotic stimulus (GO:0002831)	327	31	6.49	+	4.77	4.34e-12	1.12e-09
positive regulation of interferon-gamma production (GO:0032729)	74	7	1.47	+	4.76	0.00102	0.0343
blood coagulation (GO:0007596)	170	16	3.38	+	4.74	7.9e-07	8.45e-05
mammary gland development (GO:0030879)	128	12	2.54	+	4.72	1.96e-05	0.00131
negative regulation of response to wounding (GO:1903035)	86	8	1.71	+	4.68	0.000499	0.0191
coagulation (GO:0050817)	172	16	3.42	+	4.68	9.11e-07	9.43e-05
regulation of bone mineralization (GO:0030500)	76	7	1.51	+	4.64	0.00117	0.0387
hemostasis (GO:0007599)	174	16	3.46	+	4.63	1.05e-06	0.000107
regulation of tumor necrosis factor superfamily cytokine production (GO:1903555)	164	15	3.26	+	4.61	2.42e-06	0.000221
negative regulation of leukocyte cell-cell adhesion (GO:1903038)	132	12	2.62	+	4.58	2.6e-05	0.00164
response to vitamin (GO:0033273)	88	8	1.75	+	4.58	0.000575	0.0211
positive regulation of inflammatory response (GO:0050729)	132	12	2.62	+	4.58	2.6e-05	0.00163
regulation of production of molecular mediator of immune response (GO:0002700)	166	15	3.3	+	4.55	2.78e-06	0.000251
negative regulation of lymphocyte activation (GO:0051250)	155	14	3.08	+	4.55	5.99e-06	0.000473
regulation of NIK/NF-kappaB signaling (GO:1901222)	100	9	1.99	+	4.53	0.000283	0.0119
regulation of lipase activity (GO:0060191)	89	8	1.77	+	4.53	0.000616	0.0223
regulation of chemotaxis (GO:0050920)	223	20	4.43	+	4.52	6.91e-08	8.84e-06
regulation of peptidyl-tyrosine phosphorylation (GO:0050730)	259	23	5.14	+	4.47	8.46e-09	1.27e-06
neural crest cell development (GO:0014032)	79	7	1.57	+	4.46	0.00145	0.0456
regulation of interferon-gamma production (GO:0032649)	113	10	2.24	+	4.46	0.000149	0.00718
positive regulation of smooth muscle cell proliferation (GO:0048661)	91	8	1.81	+	4.43	0.000706	0.0251
cytokine-mediated signaling pathway (GO:0019221)	353	31	7.01	+	4.42	2.64e-11	6.01e-09
negative regulation of myeloid cell differentiation (GO:0045638)	80	7	1.59	+	4.41	0.00155	0.0481
negative regulation of leukocyte proliferation (GO:0070664)	92	8	1.83	+	4.38	0.000755	0.0267
positive regulation of defense response (GO:0031349)	265	23	5.26	+	4.37	1.26e-08	1.83e-06
positive regulation of response to external stimulus (GO:0032103)	417	36	8.28	+	4.35	9.74e-13	2.79e-10
wound healing (GO:0042060)	325	28	6.45	+	4.34	3.72e-10	7.06e-08
regulation of phagocytosis (GO:0050764)	93	8	1.85	+	4.33	0.000806	0.0282
regulation of mononuclear cell migration (GO:0071675)	117	10	2.32	+	4.3	0.000194	0.00888
regulation of interleukin-1 beta production (GO:0032651)	94	8	1.87	+	4.29	0.00086	0.0299
regulation of epithelial cell differentiation (GO:0030856)	141	12	2.8	+	4.29	4.73e-05	0.00268
cellular response to interferon-gamma (GO:0071346)	106	9	2.11	+	4.28	0.000421	0.0164
negative regulation of response to biotic stimulus (GO:0002832)	106	9	2.11	+	4.28	0.000421	0.0164
negative regulation of cell-cell adhesion (GO:0022408)	189	16	3.75	+	4.26	2.85e-06	0.000256
regulation of defense response (GO:0031347)	581	49	11.54	+	4.25	1.33e-16	9.48e-14
amide transport (GO:0042886)	120	10	2.38	+	4.2	0.000235	0.0104
regulation of myeloid leukocyte differentiation (GO:0002761)	120	10	2.38	+	4.2	0.000235	0.0104
response to cytokine (GO:0034097)	807	67	16.03	+	4.18	3.58e-22	9.4e-19
negative regulation of cell activation (GO:0050866)	205	17	4.07	+	4.18	1.82e-06	0.000172
regulation of response to external stimulus (GO:0032101)	908	75	18.03	+	4.16	1.05e-24	5.49e-21
positive regulation of endothelial cell migration (GO:0010595)	109	9	2.16	+	4.16	0.000509	0.0192
regulation of axon extension (GO:0030516)	97	8	1.93	+	4.15	0.00104	0.035
regulation of response to wounding (GO:1903034)	158	13	3.14	+	4.14	3.2e-05	0.00196
negative regulation of leukocyte activation (GO:0002695)	183	15	3.63	+	4.13	8.35e-06	0.000634
regulation of tumor necrosis factor production (GO:0032680)	159	13	3.16	+	4.12	3.4e-05	0.00207
regulation of myeloid cell differentiation (GO:0045637)	196	16	3.89	+	4.11	4.4e-06	0.00036
negative regulation of immune system process (GO:0002683)	418	34	8.3	+	4.1	1.95e-11	4.79e-09
receptor metabolic process (GO:0043112)	99	8	1.97	+	4.07	0.00118	0.0386
regulation of extent of cell growth (GO:0061387)	112	9	2.22	+	4.05	0.000611	0.0222
regulation of leukocyte migration (GO:0002685)	213	17	4.23	+	4.02	2.94e-06	0.000263
negative regulation of response to external stimulus (GO:0032102)	376	30	7.47	+	4.02	4.78e-10	8.95e-08
positive regulation of epithelial cell migration (GO:0010634)	151	12	3	+	4	8.73e-05	0.00455
response to wounding (GO:0009611)	428	34	8.5	+	4	3.53e-11	7.94e-09
positive regulation of leukocyte migration (GO:0002687)	139	11	2.76	+	3.98	0.000177	0.00828
negative regulation of immune response (GO:0050777)	190	15	3.77	+	3.98	1.27e-05	0.000897
activation of protein kinase activity (GO:0032147)	140	11	2.78	+	3.96	0.000187	0.00862
negative regulation of leukocyte differentiation (GO:1902106)	102	8	2.03	+	3.95	0.0014	0.0447
positive regulation of peptidyl-tyrosine phosphorylation (GO:0050731)	193	15	3.83	+	3.91	1.51e-05	0.00104
developmental growth involved in morphogenesis (GO:0060560)	116	9	2.3	+	3.91	0.000772	0.0273
regulation of axonogenesis (GO:0050770)	156	12	3.1	+	3.87	0.000117	0.00586
negative regulation of hemopoiesis (GO:1903707)	104	8	2.07	+	3.87	0.00158	0.0488
positive regulation of chemotaxis (GO:0050921)	145	11	2.88	+	3.82	0.000249	0.0109
regulation of cell size (GO:0008361)	185	14	3.67	+	3.81	3.79e-05	0.00223
positive regulation of production of molecular mediator of immune response (GO:0002702)	119	9	2.36	+	3.81	0.000915	0.0314
positive regulation of angiogenesis (GO:0045766)	160	12	3.18	+	3.78	0.000146	0.00711
positive regulation of vasculature development (GO:1904018)	160	12	3.18	+	3.78	0.000146	0.00709
cellular response to cytokine stimulus (GO:0071345)	702	52	13.94	+	3.73	2.13e-15	1.2e-12
negative regulation of cell adhesion (GO:0007162)	285	21	5.66	+	3.71	6.88e-07	7.46e-05
regulation of body fluid levels (GO:0050878)	367	27	7.29	+	3.7	1.79e-08	2.51e-06
positive regulation of cytokine production (GO:0001819)	464	34	9.21	+	3.69	2.62e-10	5.16e-08
aminoglycan metabolic process (GO:0006022)	123	9	2.44	+	3.68	0.00114	0.0376
regulation of inflammatory response (GO:0050727)	343	25	6.81	+	3.67	7.22e-08	9.16e-06
peptidyl-tyrosine phosphorylation (GO:0018108)	151	11	3	+	3.67	0.000345	0.014
positive regulation of cell migration (GO:0030335)	522	38	10.37	+	3.67	2.63e-11	6.09e-09
MAPK cascade (GO:0000165)	179	13	3.55	+	3.66	0.000105	0.0054
response to mechanical stimulus (GO:0009612)	222	16	4.41	+	3.63	1.89e-05	0.00127
negative regulation of defense response (GO:0031348)	222	16	4.41	+	3.63	1.89e-05	0.00127
chemotaxis (GO:0006935)	504	36	10.01	+	3.6	1.47e-10	3.05e-08
peptidyl-tyrosine modification (GO:0018212)	154	11	3.06	+	3.6	0.000403	0.0159
taxis (GO:0042330)	507	36	10.07	+	3.58	1.72e-10	3.51e-08
regulation of wound healing (GO:0061041)	127	9	2.52	+	3.57	0.0014	0.0448
positive regulation of cell-cell adhesion (GO:0022409)	285	20	5.66	+	3.53	2.55e-06	0.000232
regulation of endothelial cell migration (GO:0010594)	171	12	3.4	+	3.53	0.000259	0.0111
regulation of cytokine production (GO:0001817)	715	50	14.2	+	3.52	6.22e-14	2.45e-11
regulation of epithelial cell migration (GO:0010632)	230	16	4.57	+	3.5	2.83e-05	0.00176
positive regulation of cell motility (GO:2000147)	547	38	10.86	+	3.5	9.4e-11	2.03e-08
positive regulation of locomotion (GO:0040017)	562	39	11.16	+	3.49	5.4e-11	1.2e-08
angiogenesis (GO:0001525)	319	22	6.34	+	3.47	1.06e-06	0.000107
regulation of signaling receptor activity (GO:0010469)	175	12	3.48	+	3.45	0.000316	0.013
regulation of MAP kinase activity (GO:0043405)	176	12	3.5	+	3.43	0.000332	0.0136
vasculature development (GO:0001944)	515	35	10.23	+	3.42	9.27e-10	1.6e-07
positive regulation of cellular component movement (GO:0051272)	560	38	11.12	+	3.42	1.77e-10	3.57e-08
regulation of T cell differentiation (GO:0045580)	148	10	2.94	+	3.4	0.00109	0.0363
regeneration (GO:0031099)	163	11	3.24	+	3.4	0.00063	0.0227
positive regulation of epithelial cell proliferation (GO:0050679)	194	13	3.85	+	3.37	0.000222	0.00993
blood vessel development (GO:0001568)	493	33	9.79	+	3.37	4.07e-09	6.74e-07
cartilage development (GO:0051216)	153	10	3.04	+	3.29	0.00138	0.0444
regulation of hemopoiesis (GO:1903706)	353	23	7.01	+	3.28	1.5e-06	0.000145
innate immune response (GO:0045087)	783	51	15.55	+	3.28	4.44e-13	1.34e-10
regulation of leukocyte proliferation (GO:0070663)	246	16	4.89	+	3.28	6.03e-05	0.00333
response to nutrient (GO:0007584)	170	11	3.38	+	3.26	0.000873	0.0303
positive regulation of leukocyte differentiation (GO:1902107)	156	10	3.1	+	3.23	0.00158	0.0489
positive regulation of hemopoiesis (GO:1903708)	156	10	3.1	+	3.23	0.00158	0.0488
positive regulation of immune effector process (GO:0002699)	234	15	4.65	+	3.23	0.000119	0.00594
developmental growth (GO:0048589)	360	23	7.15	+	3.22	2.05e-06	0.000192
defense response to other organism (GO:0098542)	989	63	19.64	+	3.21	1.44e-15	8.71e-13
regulation of cell migration (GO:0030334)	896	57	17.79	+	3.2	4.05e-14	1.68e-11
regulation of cell-cell adhesion (GO:0022407)	441	28	8.76	+	3.2	1.77e-07	2.15e-05
cell chemotaxis (GO:0060326)	205	13	4.07	+	3.19	0.000367	0.0147
negative regulation of protein kinase activity (GO:0006469)	205	13	4.07	+	3.19	0.000367	0.0146
growth (GO:0040007)	363	23	7.21	+	3.19	2.34e-06	0.000215
blood vessel morphogenesis (GO:0048514)	411	26	8.16	+	3.19	5.25e-07	6.03e-05
regulation of vasculature development (GO:1901342)	286	18	5.68	+	3.17	3.19e-05	0.00196
negative regulation of cell development (GO:0010721)	175	11	3.48	+	3.17	0.00109	0.0362
regulation of response to stress (GO:0080134)	1242	78	24.67	+	3.16	6.84e-19	8.97e-16
positive regulation of leukocyte cell-cell adhesion (GO:1903039)	239	15	4.75	+	3.16	0.000148	0.00715
cell activation (GO:0001775)	622	39	12.35	+	3.16	8.59e-10	1.5e-07
response to lipopolysaccharide (GO:0032496)	319	20	6.34	+	3.16	1.23e-05	0.000878
response to molecule of bacterial origin (GO:0002237)	336	21	6.67	+	3.15	7.83e-06	0.000598
myeloid cell differentiation (GO:0030099)	224	14	4.45	+	3.15	0.000254	0.011
regulation of developmental growth (GO:0048638)	320	20	6.35	+	3.15	1.29e-05	0.000908
regulation of immune effector process (GO:0002697)	339	21	6.73	+	3.12	8.89e-06	0.00067
regulation of leukocyte mediated immunity (GO:0002703)	226	14	4.49	+	3.12	0.000276	0.0117
axon guidance (GO:0007411)	227	14	4.51	+	3.11	0.000288	0.0121
regulation of immune response (GO:0050776)	813	50	16.15	+	3.1	5.64e-12	1.41e-09
neuron projection guidance (GO:0097485)	228	14	4.53	+	3.09	0.000301	0.0125
regulation of leukocyte cell-cell adhesion (GO:1903037)	327	20	6.49	+	3.08	1.73e-05	0.00118
ameboidal-type cell migration (GO:0001667)	180	11	3.57	+	3.08	0.00135	0.0436
regulation of leukocyte differentiation (GO:1902105)	279	17	5.54	+	3.07	7.66e-05	0.00409
regulation of cell motility (GO:2000145)	952	58	18.91	+	3.07	1.34e-13	5.01e-11
extracellular matrix organization (GO:0030198)	264	16	5.24	+	3.05	0.000131	0.00649
defense response (GO:0006952)	1387	84	27.54	+	3.05	1.94e-19	3.06e-16
extracellular structure organization (GO:0043062)	265	16	5.26	+	3.04	0.000137	0.00674
positive regulation of protein kinase activity (GO:0045860)	398	24	7.9	+	3.04	3.16e-06	0.000278
regulation of immune system process (GO:0002682)	1360	82	27.01	+	3.04	7.42e-19	8.99e-16
regulation of angiogenesis (GO:0045765)	282	17	5.6	+	3.04	8.67e-05	0.00453
positive regulation of immune system process (GO:0002684)	898	54	17.83	+	3.03	1.67e-12	4.52e-10
regulation of adaptive immune response (GO:0002819)	183	11	3.63	+	3.03	0.00153	0.0477
external encapsulating structure organization (GO:0045229)	267	16	5.3	+	3.02	0.000148	0.00716
inflammatory response (GO:0006954)	502	30	9.97	+	3.01	2.19e-07	2.64e-05
leukocyte activation (GO:0045321)	502	30	9.97	+	3.01	2.19e-07	2.62e-05
negative regulation of transferase activity (GO:0051348)	268	16	5.32	+	3.01	0.000154	0.00736
negative regulation of multicellular organismal process (GO:0051241)	991	59	19.68	+	3	2.03e-13	7.09e-11
regulation of locomotion (GO:0040012)	992	59	19.7	+	2.99	2.11e-13	7.22e-11
axonogenesis (GO:0007409)	337	20	6.69	+	2.99	2.59e-05	0.00165
negative regulation of cell differentiation (GO:0045596)	641	38	12.73	+	2.99	6.08e-09	9.67e-07
transmembrane receptor protein tyrosine kinase signaling pathway (GO:0007169)	405	24	8.04	+	2.98	4.19e-06	0.00035
connective tissue development (GO:0061448)	203	12	4.03	+	2.98	0.00109	0.0363
negative regulation of cytokine production (GO:0001818)	271	16	5.38	+	2.97	0.000174	0.00818
regulation of multicellular organismal development (GO:2000026)	1296	76	25.74	+	2.95	7.83e-17	6.48e-14
regulation of kinase activity (GO:0043549)	758	44	15.05	+	2.92	6.56e-10	1.2e-07
gliogenesis (GO:0042063)	224	13	4.45	+	2.92	0.000805	0.0283
negative regulation of protein phosphorylation (GO:0001933)	328	19	6.51	+	2.92	5.6e-05	0.0031
regulation of protein kinase activity (GO:0045859)	639	37	12.69	+	2.92	1.74e-08	2.47e-06
regulation of cellular component movement (GO:0051270)	1027	59	20.4	+	2.89	8.41e-13	2.45e-10
negative regulation of kinase activity (GO:0033673)	227	13	4.51	+	2.88	0.000903	0.0312
regulation of ERK1 and ERK2 cascade (GO:0070372)	298	17	5.92	+	2.87	0.000162	0.0077
negative regulation of locomotion (GO:0040013)	317	18	6.3	+	2.86	0.000111	0.00565
negative regulation of growth (GO:0045926)	247	14	4.91	+	2.85	0.00064	0.023
positive regulation of cell adhesion (GO:0045785)	442	25	8.78	+	2.85	5.71e-06	0.000454
axon development (GO:0061564)	375	21	7.45	+	2.82	3.67e-05	0.00219
negative regulation of developmental process (GO:0051093)	877	49	17.42	+	2.81	2.21e-10	4.41e-08
negative regulation of cell migration (GO:0030336)	270	15	5.36	+	2.8	0.000505	0.0191
synapse organization (GO:0050808)	289	16	5.74	+	2.79	0.000344	0.014
neuron projection morphogenesis (GO:0048812)	455	25	9.04	+	2.77	9.16e-06	0.000683
response to other organism (GO:0051707)	1371	75	27.23	+	2.75	4.39e-15	2.09e-12
response to external biotic stimulus (GO:0043207)	1372	75	27.25	+	2.75	4.55e-15	2.11e-12
mononuclear cell differentiation (GO:1903131)	293	16	5.82	+	2.75	0.000398	0.0158
regulation of transferase activity (GO:0051338)	879	48	17.46	+	2.75	7.07e-10	1.26e-07
plasma membrane bounded cell projection morphogenesis (GO:0120039)	459	25	9.12	+	2.74	1.06e-05	0.000766
negative regulation of phosphorylation (GO:0042326)	368	20	7.31	+	2.74	8.27e-05	0.00437
response to biotic stimulus (GO:0009607)	1417	77	28.14	+	2.74	2.47e-15	1.29e-12
regulation of cell adhesion (GO:0030155)	737	40	14.64	+	2.73	2.43e-08	3.38e-06
positive regulation of kinase activity (GO:0033674)	480	26	9.53	+	2.73	7.71e-06	0.000592
cell projection morphogenesis (GO:0048858)	463	25	9.19	+	2.72	1.21e-05	0.000868
cell morphogenesis involved in neuron differentiation (GO:0048667)	408	22	8.1	+	2.72	4.12e-05	0.00237
leukocyte differentiation (GO:0002521)	353	19	7.01	+	2.71	0.00014	0.00684
positive regulation of multicellular organismal process (GO:0051240)	1413	76	28.06	+	2.71	6.51e-15	2.93e-12
enzyme linked receptor protein signaling pathway (GO:0007167)	597	32	11.86	+	2.7	8.41e-07	8.77e-05
hemopoiesis (GO:0030097)	579	31	11.5	+	2.7	1.28e-06	0.000125
positive regulation of immune response (GO:0050778)	562	30	11.16	+	2.69	2.02e-06	0.000191
regulation of epithelial cell proliferation (GO:0050678)	340	18	6.75	+	2.67	0.000252	0.011
negative regulation of cell motility (GO:2000146)	285	15	5.66	+	2.65	0.000855	0.0298
hematopoietic or lymphoid organ development (GO:0048534)	627	33	12.45	+	2.65	8.28e-07	8.68e-05
biological process involved in interspecies interaction between organisms (GO:0044419)	1520	80	30.19	+	2.65	3.38e-15	1.71e-12
immune response (GO:0006955)	1677	88	33.3	+	2.64	1.17e-16	8.73e-14
immune system process (GO:0002376)	2368	124	47.03	+	2.64	5.87e-24	2.31e-20
cell morphogenesis involved in differentiation (GO:0000904)	517	27	10.27	+	2.63	9.66e-06	0.00071
glycoprotein biosynthetic process (GO:0009101)	269	14	5.34	+	2.62	0.00139	0.0447
response to external stimulus (GO:0009605)	2405	125	47.76	+	2.62	6.74e-24	2.12e-20
regulation of multicellular organismal process (GO:0051239)	2582	134	51.28	+	2.61	8.47e-26	1.33e-21
cell part morphogenesis (GO:0032990)	483	25	9.59	+	2.61	2.38e-05	0.00154
positive regulation of nervous system development (GO:0051962)	271	14	5.38	+	2.6	0.00149	0.0466
positive regulation of transferase activity (GO:0051347)	562	29	11.16	+	2.6	5.61e-06	0.000448
regulation of cell differentiation (GO:0045595)	1496	77	29.71	+	2.59	4.89e-14	1.97e-11
regulation of T cell activation (GO:0050863)	331	17	6.57	+	2.59	0.000515	0.0193
regulation of cell activation (GO:0050865)	663	34	13.17	+	2.58	9.79e-07	0.000101
negative regulation of cellular component movement (GO:0051271)	293	15	5.82	+	2.58	0.00111	0.0369
immune system development (GO:0002520)	665	34	13.21	+	2.57	1.04e-06	0.000107
regulation of MAPK cascade (GO:0043408)	653	33	12.97	+	2.54	3.03e-06	0.000269
cell-cell adhesion (GO:0098609)	515	26	10.23	+	2.54	2.45e-05	0.00158
reproductive structure development (GO:0048608)	416	21	8.26	+	2.54	0.000148	0.00717
positive regulation of developmental process (GO:0051094)	1269	64	25.2	+	2.54	1.99e-11	4.81e-09
cell morphogenesis (GO:0000902)	675	34	13.4	+	2.54	2.12e-06	0.000198
regulation of nervous system development (GO:0051960)	438	22	8.7	+	2.53	0.00011	0.00565
regulation of neurogenesis (GO:0050767)	359	18	7.13	+	2.52	0.000467	0.018
reproductive system development (GO:0061458)	419	21	8.32	+	2.52	0.000162	0.00771
negative regulation of phosphate metabolic process (GO:0045936)	422	21	8.38	+	2.51	0.000178	0.00831
negative regulation of phosphorus metabolic process (GO:0010563)	423	21	8.4	+	2.5	0.000183	0.00852
negative regulation of response to stimulus (GO:0048585)	1555	77	30.88	+	2.49	3.67e-13	1.16e-10
regulation of phosphorylation (GO:0042325)	1237	61	24.57	+	2.48	1.41e-10	2.96e-08
cell surface receptor signaling pathway (GO:0007166)	2029	99	40.29	+	2.46	9.2e-17	7.24e-14
regulation of growth (GO:0040008)	659	32	13.09	+	2.45	7.06e-06	0.000548
cellular response to organic substance (GO:0071310)	1978	96	39.28	+	2.44	6.57e-16	4.13e-13
regulation of developmental process (GO:0050793)	2374	115	47.15	+	2.44	2.23e-19	3.18e-16
regulation of anatomical structure morphogenesis (GO:0022603)	910	44	18.07	+	2.43	1.17e-07	1.47e-05
cell junction organization (GO:0034330)	476	23	9.45	+	2.43	0.000182	0.0085
negative regulation of cell population proliferation (GO:0008285)	704	34	13.98	+	2.43	3.83e-06	0.000328
glycoprotein metabolic process (GO:0009100)	333	16	6.61	+	2.42	0.00145	0.0455
skeletal system development (GO:0001501)	479	23	9.51	+	2.42	0.000192	0.0088
response to oxygen levels (GO:0070482)	334	16	6.63	+	2.41	0.00149	0.0466
sensory system development (GO:0048880)	377	18	7.49	+	2.4	0.0012	0.0392
regulation of cell growth (GO:0001558)	420	20	8.34	+	2.4	0.000592	0.0216
tube morphogenesis (GO:0035239)	655	31	13.01	+	2.38	1.49e-05	0.00103
positive regulation of phosphorus metabolic process (GO:0010562)	891	42	17.69	+	2.37	5.7e-07	6.5e-05
positive regulation of phosphate metabolic process (GO:0045937)	891	42	17.69	+	2.37	5.7e-07	6.45e-05
regulation of phosphate metabolic process (GO:0019220)	1380	65	27.41	+	2.37	2.77e-10	5.38e-08
regulation of phosphorus metabolic process (GO:0051174)	1380	65	27.41	+	2.37	2.77e-10	5.31e-08
positive regulation of gene expression (GO:0010628)	1127	53	22.38	+	2.37	1.32e-08	1.9e-06
regulation of protein phosphorylation (GO:0001932)	1089	51	21.63	+	2.36	2.92e-08	3.96e-06
positive regulation of cell differentiation (GO:0045597)	833	39	16.54	+	2.36	1.79e-06	0.000171
positive regulation of MAPK cascade (GO:0043410)	471	22	9.35	+	2.35	0.000347	0.0141
regulation of cell population proliferation (GO:0042127)	1654	77	32.85	+	2.34	5.23e-12	1.33e-09
cellular response to nitrogen compound (GO:1901699)	626	29	12.43	+	2.33	3.99e-05	0.00232
regulation of cellular component size (GO:0032535)	389	18	7.73	+	2.33	0.00144	0.0453
anatomical structure formation involved in morphogenesis (GO:0048646)	888	41	17.63	+	2.32	1.13e-06	0.000112
response to organic substance (GO:0010033)	2686	124	53.34	+	2.32	1.94e-19	3.4e-16
negative regulation of protein modification process (GO:0031400)	501	23	9.95	+	2.31	0.0003	0.0125
cellular component morphogenesis (GO:0032989)	569	26	11.3	+	2.3	0.000125	0.00621
positive regulation of phosphorylation (GO:0042327)	812	37	16.13	+	2.29	5.27e-06	0.000423
circulatory system development (GO:0072359)	881	40	17.5	+	2.29	2.17e-06	0.000201
cellular response to chemical stimulus (GO:0070887)	2555	116	50.74	+	2.29	1.77e-17	1.74e-14
positive regulation of protein phosphorylation (GO:0001934)	727	33	14.44	+	2.29	2.04e-05	0.00136
positive regulation of catalytic activity (GO:0043085)	1119	50	22.22	+	2.25	1.67e-07	2.03e-05
neuron projection development (GO:0031175)	651	29	12.93	+	2.24	9.22e-05	0.00479
regulation of cell development (GO:0060284)	495	22	9.83	+	2.24	0.00059	0.0216
response to peptide (GO:1901652)	450	20	8.94	+	2.24	0.00107	0.0358
negative regulation of catalytic activity (GO:0043086)	766	34	15.21	+	2.24	2.07e-05	0.00138
response to bacterium (GO:0009617)	721	32	14.32	+	2.23	3.8e-05	0.00222
cellular response to organonitrogen compound (GO:0071417)	566	25	11.24	+	2.22	0.000359	0.0145
positive regulation of signal transduction (GO:0009967)	1461	64	29.01	+	2.21	5.94e-09	9.55e-07
positive regulation of molecular function (GO:0044093)	1507	66	29.93	+	2.21	3.06e-09	5.24e-07
positive regulation of response to stimulus (GO:0048584)	2082	91	41.35	+	2.2	1.56e-12	4.4e-10
positive regulation of intracellular signal transduction (GO:1902533)	961	42	19.08	+	2.2	3.14e-06	0.000277
positive regulation of cell population proliferation (GO:0008284)	939	41	18.65	+	2.2	4.32e-06	0.000358
regulation of leukocyte activation (GO:0002694)	619	27	12.29	+	2.2	0.000216	0.00978
negative regulation of signal transduction (GO:0009968)	1197	52	23.77	+	2.19	2.25e-07	2.66e-05
response to stress (GO:0006950)	3337	144	66.27	+	2.17	3.46e-20	6.8e-17
tube development (GO:0035295)	858	37	17.04	+	2.17	1.76e-05	0.0012
negative regulation of protein metabolic process (GO:0051248)	1029	44	20.44	+	2.15	3.53e-06	0.000307
locomotion (GO:0040011)	1195	51	23.73	+	2.15	6.69e-07	7.36e-05
regulation of catalytic activity (GO:0050790)	2372	101	47.11	+	2.14	2.77e-13	9.08e-11
negative regulation of cellular protein metabolic process (GO:0032269)	963	41	19.12	+	2.14	9.52e-06	0.000704
response to lipid (GO:0033993)	828	35	16.44	+	2.13	4.26e-05	0.00244
positive regulation of cell communication (GO:0010647)	1633	69	32.43	+	2.13	6.77e-09	1.05e-06
regulation of anatomical structure size (GO:0090066)	521	22	10.35	+	2.13	0.0013	0.042
tissue morphogenesis (GO:0048729)	546	23	10.84	+	2.12	0.000993	0.0336
positive regulation of protein modification process (GO:0031401)	974	41	19.34	+	2.12	1.1e-05	0.000794
positive regulation of signaling (GO:0023056)	1640	69	32.57	+	2.12	7.19e-09	1.1e-06
response to nitrogen compound (GO:1901698)	1071	45	21.27	+	2.12	3.58e-06	0.00031
neuron development (GO:0048666)	810	34	16.09	+	2.11	6.26e-05	0.00342
negative regulation of cell communication (GO:0010648)	1294	54	25.7	+	2.1	6.03e-07	6.72e-05
response to organonitrogen compound (GO:0010243)	984	41	19.54	+	2.1	1.29e-05	0.000904
cell migration (GO:0016477)	840	35	16.68	+	2.1	7.64e-05	0.00409
negative regulation of signaling (GO:0023057)	1298	54	25.78	+	2.09	6.23e-07	6.9e-05
regulation of vesicle-mediated transport (GO:0060627)	529	22	10.51	+	2.09	0.00148	0.0465
epithelial cell differentiation (GO:0030855)	532	22	10.57	+	2.08	0.00156	0.0484
tissue development (GO:0009888)	1600	66	31.77	+	2.08	2.81e-08	3.84e-06
response to chemical (GO:0042221)	4052	167	80.47	+	2.08	3.68e-22	8.27e-19
anatomical structure morphogenesis (GO:0009653)	2138	88	42.46	+	2.07	1.05e-10	2.23e-08
cell adhesion (GO:0007155)	952	39	18.91	+	2.06	2.95e-05	0.00183
biological adhesion (GO:0022610)	958	39	19.03	+	2.05	4.72e-05	0.00268
regulation of hydrolase activity (GO:0051336)	991	40	19.68	+	2.03	3.8e-05	0.00222
cellular response to oxygen-containing compound (GO:1901701)	1042	42	20.69	+	2.03	2.21e-05	0.00145
epithelium development (GO:0060429)	968	39	19.22	+	2.03	5.18e-05	0.00291
positive regulation of cellular component organization (GO:0051130)	1120	45	22.24	+	2.02	1.47e-05	0.00103
regulation of signal transduction (GO:0009966)	2855	114	56.7	+	2.01	2.66e-13	8.9e-11
regulation of response to stimulus (GO:0048583)	3785	151	75.17	+	2.01	2.94e-18	3.31e-15
negative regulation of molecular function (GO:0044092)	1130	45	22.44	+	2.01	1.63e-05	0.00112
regulation of protein modification process (GO:0031399)	1486	59	29.51	+	2	6.94e-07	7.48e-05
regulation of molecular function (GO:0065009)	3065	121	60.87	+	1.99	8.69e-14	3.33e-11
negative regulation of apoptotic process (GO:0043066)	870	34	17.28	+	1.97	0.000285	0.012
response to oxygen-containing compound (GO:1901700)	1566	61	31.1	+	1.96	7.98e-07	8.49e-05
regulation of localization (GO:0032879)	2711	105	53.84	+	1.95	2.03e-11	4.83e-09
positive regulation of transport (GO:0051050)	909	35	18.05	+	1.94	0.000258	0.0111
animal organ morphogenesis (GO:0009887)	961	37	19.08	+	1.94	0.000218	0.00985
negative regulation of programmed cell death (GO:0043069)	888	34	17.63	+	1.93	0.000354	0.0143
neuron differentiation (GO:0030182)	1008	38	20.02	+	1.9	0.00021	0.00956
negative regulation of cell death (GO:0060548)	982	37	19.5	+	1.9	0.000269	0.0114
regulation of signaling (GO:0023051)	3245	122	64.44	+	1.89	1.7e-12	4.52e-10
regulation of cell communication (GO:0010646)	3230	121	64.15	+	1.89	2.65e-12	6.96e-10
positive regulation of cellular protein metabolic process (GO:0032270)	1370	51	27.21	+	1.87	2.36e-05	0.00153
regulation of intracellular signal transduction (GO:1902531)	1648	61	32.73	+	1.86	3.79e-06	0.000326
response to organic cyclic compound (GO:0014070)	896	33	17.79	+	1.85	0.000907	0.0312
localization of cell (GO:0051674)	986	36	19.58	+	1.84	0.000652	0.0233
cell motility (GO:0048870)	986	36	19.58	+	1.84	0.000652	0.0233
regulation of apoptotic process (GO:0042981)	1426	52	28.32	+	1.84	3.36e-05	0.00205
response to abiotic stimulus (GO:0009628)	1125	41	22.34	+	1.84	0.000269	0.0114
positive regulation of protein metabolic process (GO:0051247)	1459	53	28.97	+	1.83	2.8e-05	0.00175
system development (GO:0048731)	4174	151	82.89	+	1.82	1.83e-14	7.77e-12
cell death (GO:0008219)	977	35	19.4	+	1.8	0.000986	0.0336
animal organ development (GO:0048513)	3080	110	61.17	+	1.8	8.48e-10	1.5e-07
regulation of programmed cell death (GO:0043067)	1456	52	28.91	+	1.8	6.05e-05	0.00333
plasma membrane bounded cell projection organization (GO:0120036)	1067	38	21.19	+	1.79	0.000696	0.0248
intracellular signal transduction (GO:0035556)	1464	52	29.07	+	1.79	6.48e-05	0.00353
regulation of cellular protein metabolic process (GO:0032268)	2331	82	46.29	+	1.77	4.11e-07	4.79e-05
regulation of cell death (GO:0010941)	1593	56	31.64	+	1.77	5.43e-05	0.00304
response to endogenous stimulus (GO:0009719)	1341	47	26.63	+	1.76	0.000253	0.011
signal transduction (GO:0007165)	4720	165	93.74	+	1.76	9.45e-15	4.13e-12
cell projection organization (GO:0030030)	1118	39	22.2	+	1.76	0.000906	0.0312
generation of neurons (GO:0048699)	1237	43	24.57	+	1.75	0.000504	0.019
signaling (GO:0023052)	5057	175	100.43	+	1.74	1.55e-15	9.03e-13
cell development (GO:0048468)	1621	56	32.19	+	1.74	6.58e-05	0.00357
neurogenesis (GO:0022008)	1361	47	27.03	+	1.74	0.00029	0.0121
regulation of protein metabolic process (GO:0051246)	2495	86	49.55	+	1.74	5.81e-07	6.53e-05
cell communication (GO:0007154)	5160	177	102.47	+	1.73	2.35e-15	1.27e-12
multicellular organism development (GO:0007275)	4528	155	89.92	+	1.72	7.05e-13	2.09e-10
negative regulation of biological process (GO:0048519)	5181	177	102.89	+	1.72	4.04e-15	1.98e-12
negative regulation of cellular process (GO:0048523)	4778	162	94.89	+	1.71	3.25e-13	1.04e-10
cell differentiation (GO:0030154)	3401	115	67.54	+	1.7	6.17e-09	9.71e-07
anatomical structure development (GO:0048856)	5003	168	99.36	+	1.69	1.43e-13	5.22e-11
regulation of cellular component organization (GO:0051128)	2363	79	46.93	+	1.68	5.18e-06	0.000418
cellular developmental process (GO:0048869)	3461	115	68.73	+	1.67	1.74e-08	2.48e-06
response to stimulus (GO:0050896)	8034	265	159.55	+	1.66	2.65e-25	2.08e-21
positive regulation of biological process (GO:0048518)	6064	200	120.43	+	1.66	3.77e-16	2.47e-13
regulation of transport (GO:0051049)	1732	57	34.4	+	1.66	0.00022	0.00988
positive regulation of macromolecule metabolic process (GO:0010604)	3384	111	67.2	+	1.65	6.38e-08	8.22e-06
cellular response to stimulus (GO:0051716)	6376	208	126.62	+	1.64	1.56e-16	1.07e-13
positive regulation of metabolic process (GO:0009893)	3678	119	73.04	+	1.63	3.82e-08	5.1e-06
positive regulation of cellular process (GO:0048522)	5584	180	110.89	+	1.62	4.29e-13	1.32e-10
cellular protein modification process (GO:0006464)	2614	82	51.91	+	1.58	3.57e-05	0.00215
protein modification process (GO:0036211)	2614	82	51.91	+	1.58	3.57e-05	0.00214
developmental process (GO:0032502)	5567	174	110.56	+	1.57	2.45e-11	5.76e-09
regulation of biological quality (GO:0065008)	3796	117	75.39	+	1.55	6.74e-07	7.36e-05
macromolecule modification (GO:0043412)	2828	87	56.16	+	1.55	3.52e-05	0.00213
positive regulation of cellular metabolic process (GO:0031325)	3190	98	63.35	+	1.55	9.75e-06	0.000714
positive regulation of nitrogen compound metabolic process (GO:0051173)	2995	92	59.48	+	1.55	2.09e-05	0.00138
negative regulation of nitrogen compound metabolic process (GO:0051172)	2381	73	47.28	+	1.54	0.000236	0.0104
negative regulation of cellular metabolic process (GO:0031324)	2545	76	50.54	+	1.5	0.000358	0.0144
nervous system development (GO:0007399)	2194	65	43.57	+	1.49	0.00122	0.04
negative regulation of macromolecule metabolic process (GO:0010605)	2738	80	54.37	+	1.47	0.000422	0.0164
negative regulation of metabolic process (GO:0009892)	2951	85	58.6	+	1.45	0.000474	0.0182
multicellular organismal process (GO:0032501)	6584	187	130.75	+	1.43	1.18e-08	1.73e-06
protein metabolic process (GO:0019538)	3811	105	75.68	+	1.39	0.000402	0.0159
regulation of metabolic process (GO:0019222)	6587	179	130.81	+	1.37	8.01e-07	8.46e-05
regulation of macromolecule metabolic process (GO:0060255)	6086	165	120.86	+	1.37	4.14e-06	0.000348
regulation of cellular metabolic process (GO:0031323)	5927	160	117.71	+	1.36	9.79e-06	0.000713
organonitrogen compound metabolic process (GO:1901564)	4789	129	95.11	+	1.36	0.000153	0.00732
regulation of gene expression (GO:0010468)	4752	126	94.37	+	1.34	0.000375	0.0149
regulation of nitrogen compound metabolic process (GO:0051171)	5538	144	109.98	+	1.31	0.000251	0.011
localization (GO:0051179)	5080	132	100.88	+	1.31	0.000627	0.0226
regulation of primary metabolic process (GO:0080090)	5706	146	113.32	+	1.29	0.000536	0.0201
regulation of cellular process (GO:0050794)	11068	278	219.8	+	1.26	9.05e-09	1.34e-06
regulation of biological process (GO:0050789)	11523	287	228.84	+	1.25	5.8e-09	9.41e-07
biological regulation (GO:0065007)	12253	298	243.33	+	1.22	3.16e-08	4.25e-06
cellular process (GO:0009987)	15054	361	298.96	+	1.21	1.54e-13	5.5e-11
biological_process (GO:0008150)	17689	389	351.29	+	1.11	3.28e-09	5.55e-07
Unclassified (UNCLASSIFIED)	2906	20	57.71	-	0.35	3.28e-09	5.49e-07
RNA processing (GO:0006396)	847	4	16.82	-	0.24	0.000335	0.0137
detection of chemical stimulus involved in sensory perception (GO:0050907)	488	1	9.69	-	0.1	0.00131	0.0422
sensory perception of chemical stimulus (GO:0007606)	542	1	10.76	-	0.09	0.000422	0.0164
detection of chemical stimulus involved in sensory perception of smell (GO:0050911)	443	0	8.8	-	< 0,01	0.000328	0.0135
RNA splicing (GO:0008380)	355	0	7.05	-	< 0,01	0.00152	0.0474
sensory perception of smell (GO:0007608)	468	0	9.29	-	< 0,01	0.000232	0.0103

## Sheet: GO reactome UP
Analysis Type:	PANTHER Overrepresentation Test (Released 20210224)
Annotation Version and Release Date:	Reactome version 65 Released 2020-11-17
Analyzed List:	upload_1 (Homo sapiens)
Reference List:	Homo sapiens (all genes in database)
Test Type:	FISHER
Correction:	FDR
Reactome pathways	Homo sapiens - REFLIST (20595)	upload_1 (409)	upload_1 (expected)	upload_1 (over/under)	upload_1 (fold Enrichment)	upload_1 (raw P-value)	upload_1 (FDR)
Inhibition of Signaling by Overexpressed EGFR (R-HSA-5638303)	8	4	0.16	+	25.18	6.2e-05	0.00615
Signaling by Overexpressed Wild-Type EGFR in Cancer (R-HSA-5638302)	8	4	0.16	+	25.18	6.2e-05	0.0059
EGFR interacts with phospholipase C-gamma (R-HSA-212718)	9	4	0.18	+	22.38	8.81e-05	0.00719
GRB2 events in EGFR signaling (R-HSA-179812)	11	4	0.22	+	18.31	0.000163	0.012
SHC1 events in EGFR signaling (R-HSA-180336)	12	4	0.24	+	16.78	0.000214	0.014
Sema3A PAK dependent Axon repulsion (R-HSA-399954)	16	5	0.32	+	15.74	4.3e-05	0.00467
Dissolution of Fibrin Clot (R-HSA-75205)	13	4	0.26	+	15.49	0.000276	0.0157
Growth hormone receptor signaling (R-HSA-982772)	23	7	0.46	+	15.33	1.39e-06	0.000245
Interferon alpha/beta signaling (R-HSA-909733)	67	20	1.33	+	15.03	2.78e-16	1.59e-13
SEMA3A-Plexin repulsion signaling by inhibiting Integrin adhesion (R-HSA-399955)	14	4	0.28	+	14.39	0.000349	0.0194
Other semaphorin interactions (R-HSA-416700)	19	5	0.38	+	13.25	8.56e-05	0.00724
CRMPs in Sema3A signaling (R-HSA-399956)	16	4	0.32	+	12.59	0.000536	0.0272
GAB1 signalosome (R-HSA-180292)	16	4	0.32	+	12.59	0.000536	0.0266
Laminin interactions (R-HSA-3000157)	30	7	0.6	+	11.75	6.27e-06	0.000895
Nicotinamide salvaging (R-HSA-197264)	19	4	0.38	+	10.6	0.000935	0.0419
Estrogen-dependent nuclear events downstream of ESR-membrane signaling (R-HSA-9634638)	24	5	0.48	+	10.49	0.000221	0.014
Interleukin-7 signaling (R-HSA-1266695)	25	5	0.5	+	10.07	0.000261	0.0153
Syndecan interactions (R-HSA-3000170)	27	5	0.54	+	9.32	0.000357	0.0194
EGFR downregulation (R-HSA-182971)	30	5	0.6	+	8.39	0.000548	0.0266
Nicotinate metabolism (R-HSA-196807)	31	5	0.62	+	8.12	0.000626	0.0292
Interferon Signaling (R-HSA-913531)	196	31	3.89	+	7.96	1.45e-17	1.1e-14
Signaling by SCF-KIT (R-HSA-1433557)	39	6	0.77	+	7.75	0.000225	0.0139
Interferon gamma signaling (R-HSA-877300)	91	14	1.81	+	7.75	1.66e-08	5.41e-06
Negative regulators of DDX58/IFIH1 signaling (R-HSA-936440)	34	5	0.68	+	7.41	0.000912	0.0417
ISG15 antiviral mechanism (R-HSA-1169408)	71	9	1.41	+	6.38	2.52e-05	0.00303
Antiviral mechanism by IFN-stimulated genes (R-HSA-1169410)	79	10	1.57	+	6.37	9.08e-06	0.00122
Interleukin-4 and Interleukin-13 signaling (R-HSA-6785807)	111	14	2.2	+	6.35	1.56e-07	3.55e-05
Semaphorin interactions (R-HSA-373755)	64	8	1.27	+	6.29	7.78e-05	0.00683
Extra-nuclear estrogen signaling (R-HSA-9009391)	73	8	1.45	+	5.52	0.00018	0.0128
Platelet degranulation (R-HSA-114608)	127	13	2.52	+	5.15	3.67e-06	0.000599
Response to elevated platelet cytosolic Ca2+ (R-HSA-76005)	132	13	2.62	+	4.96	5.42e-06	0.000825
Integrin cell surface interactions (R-HSA-216083)	84	8	1.67	+	4.8	0.000432	0.0229
Negative regulation of the PI3K/AKT network (R-HSA-199418)	96	9	1.91	+	4.72	0.000213	0.0143
PI5P, PP2A and IER3 Regulate PI3K/AKT Signaling (R-HSA-6811558)	89	8	1.77	+	4.53	0.000616	0.0293
Cytokine Signaling in Immune system (R-HSA-1280215)	823	72	16.34	+	4.41	4.43e-25	5.06e-22
Metabolism of water-soluble vitamins and cofactors (R-HSA-196849)	120	10	2.38	+	4.2	0.000235	0.0141
Degradation of the extracellular matrix (R-HSA-1474228)	140	11	2.78	+	3.96	0.000187	0.013
Extracellular matrix organization (R-HSA-1474244)	299	22	5.94	+	3.71	3.82e-07	7.92e-05
Signaling by Interleukins (R-HSA-449147)	447	31	8.88	+	3.49	5.64e-09	2.15e-06
FLT3 Signaling (R-HSA-9607240)	250	17	4.96	+	3.42	2.1e-05	0.00267
Platelet activation, signaling and aggregation (R-HSA-76002)	259	17	5.14	+	3.31	3.21e-05	0.00366
RAF/MAP kinase cascade (R-HSA-5673001)	232	15	4.61	+	3.26	0.000108	0.00854
Metabolism of vitamins and cofactors (R-HSA-196854)	186	12	3.69	+	3.25	0.000529	0.0275
MAPK1/MAPK3 signaling (R-HSA-5684996)	237	15	4.71	+	3.19	0.000135	0.0103
MAPK family signaling cascades (R-HSA-5683057)	276	17	5.48	+	3.1	6.76e-05	0.00618
Signaling by Receptor Tyrosine Kinases (R-HSA-9006934)	457	27	9.08	+	2.97	1.1e-06	0.00021
Immune System (R-HSA-168256)	2158	121	42.86	+	2.82	8.62e-26	1.97e-22
Hemostasis (R-HSA-109582)	669	37	13.29	+	2.78	5.33e-08	1.52e-05
Neutrophil degranulation (R-HSA-6798695)	478	24	9.49	+	2.53	5.46e-05	0.00567
Innate Immune System (R-HSA-168249)	1105	50	21.94	+	2.28	1.26e-07	3.2e-05
Unclassified (UNCLASSIFIED)	9941	127	197.42	-	0.64	3.36e-12	1.53e-09

## Sheet: GO Bio proc Down
Analysis Type:	PANTHER Overrepresentation Test (Released 20210224)
Annotation Version and Release Date:	GO Ontology database DOI: 10,5281/zenodo,4735677 Released 2021-05-01
Analyzed List:	upload_1 (Homo sapiens)
Reference List:	Homo sapiens (all genes in database)
Test Type:	FISHER
Correction:	FDR
GO biological process complete	Homo sapiens - REFLIST (20595)	upload_1 (167)	upload_1 (expected)	upload_1 (over/under)	upload_1 (fold Enrichment)	upload_1 (raw P-value)	upload_1 (FDR)
intermediate filament bundle assembly (GO:0045110)	7	3	0.06	+	52.85	5.88e-05	0.0136
endochondral ossification (GO:0001958)	27	4	0.22	+	18.27	0.000107	0.0208
replacement ossification (GO:0036075)	27	4	0.22	+	18.27	0.000107	0.0206
collagen fibril organization (GO:0030199)	57	7	0.46	+	15.14	8.11e-07	0.000608
extracellular matrix assembly (GO:0085029)	33	4	0.27	+	14.95	0.000217	0.0319
bone mineralization (GO:0030282)	51	6	0.41	+	14.51	6.4e-06	0.00224
platelet-derived growth factor receptor signaling pathway (GO:0048008)	34	4	0.28	+	14.51	0.000241	0.0348
positive regulation of ossification (GO:0045778)	50	5	0.41	+	12.33	7.97e-05	0.0174
negative regulation of Ras protein signal transduction (GO:0046580)	50	5	0.41	+	12.33	7.97e-05	0.0172
negative regulation of small GTPase mediated signal transduction (GO:0051058)	58	5	0.47	+	10.63	0.000153	0.0259
biomineralization (GO:0110148)	95	8	0.77	+	10.39	1.84e-06	0.00111
biomineral tissue development (GO:0031214)	95	8	0.77	+	10.39	1.84e-06	0.00107
regulation of cartilage development (GO:0061035)	72	6	0.58	+	10.28	3.94e-05	0.00984
negative regulation of epithelial cell proliferation (GO:0050680)	129	10	1.05	+	9.56	1.89e-07	0.000186
regulation of endothelial cell proliferation (GO:0001936)	135	10	1.09	+	9.14	2.81e-07	0.000245
body fluid secretion (GO:0007589)	71	5	0.58	+	8.68	0.00037	0.0469
positive regulation of protein binding (GO:0032092)	88	6	0.71	+	8.41	0.000112	0.021
odontogenesis (GO:0042476)	122	8	0.99	+	8.09	1.05e-05	0.00343
positive regulation of endothelial cell proliferation (GO:0001938)	93	6	0.75	+	7.96	0.00015	0.0256
regulation of biomineral tissue development (GO:0070167)	95	6	0.77	+	7.79	0.000167	0.0265
regulation of biomineralization (GO:0110149)	97	6	0.79	+	7.63	0.000186	0.029
negative regulation of cellular response to growth factor stimulus (GO:0090288)	98	6	0.79	+	7.55	0.000196	0.0299
negative regulation of angiogenesis (GO:0016525)	103	6	0.84	+	7.18	0.000253	0.0359
negative regulation of blood vessel morphogenesis (GO:2000181)	104	6	0.84	+	7.11	0.000266	0.037
negative regulation of vasculature development (GO:1901343)	105	6	0.85	+	7.05	0.000279	0.0382
positive regulation of endothelial cell migration (GO:0010595)	109	6	0.88	+	6.79	0.000338	0.0439
regulation of smooth muscle cell proliferation (GO:0048660)	147	8	1.19	+	6.71	3.74e-05	0.00965
regulation of epithelial cell migration (GO:0010632)	230	11	1.87	+	5.9	4.22e-06	0.00166
regulation of epithelial cell proliferation (GO:0050678)	340	16	2.76	+	5.8	3.19e-08	5.57e-05
regulation of endothelial cell migration (GO:0010594)	171	8	1.39	+	5.77	0.000103	0.0203
positive regulation of epithelial cell migration (GO:0010634)	151	7	1.22	+	5.72	0.000296	0.0398
extracellular matrix organization (GO:0030198)	264	12	2.14	+	5.61	2.53e-06	0.00114
extracellular structure organization (GO:0043062)	265	12	2.15	+	5.58	2.63e-06	0.00112
external encapsulating structure organization (GO:0045229)	267	12	2.17	+	5.54	2.83e-06	0.00117
ossification (GO:0001503)	269	12	2.18	+	5.5	3.04e-06	0.00123
bone development (GO:0060348)	190	8	1.54	+	5.19	0.000206	0.0306
positive regulation of epithelial cell proliferation (GO:0050679)	194	8	1.57	+	5.09	0.000236	0.0344
regulation of protein binding (GO:0043393)	198	8	1.61	+	4.98	0.00027	0.0373
negative regulation of kinase activity (GO:0033673)	227	9	1.84	+	4.89	0.000128	0.023
regulation of angiogenesis (GO:0045765)	282	11	2.29	+	4.81	2.64e-05	0.00754
regulation of vasculature development (GO:1901342)	286	11	2.32	+	4.74	2.99e-05	0.00824
negative regulation of cell population proliferation (GO:0008285)	704	24	5.71	+	4.2	4.56e-09	3.59e-05
regulation of small GTPase mediated signal transduction (GO:0051056)	308	10	2.5	+	4	0.000262	0.0368
blood vessel morphogenesis (GO:0048514)	411	13	3.33	+	3.9	4.07e-05	0.01
angiogenesis (GO:0001525)	319	10	2.59	+	3.87	0.000343	0.0443
camera-type eye development (GO:0043010)	319	10	2.59	+	3.87	0.000343	0.0439
blood vessel development (GO:0001568)	493	15	4	+	3.75	1.59e-05	0.00502
positive regulation of cellular component movement (GO:0051272)	560	17	4.54	+	3.74	4.35e-06	0.00167
negative regulation of developmental process (GO:0051093)	877	26	7.11	+	3.66	1.58e-08	4.15e-05
negative regulation of cell differentiation (GO:0045596)	641	19	5.2	+	3.66	1.62e-06	0.00106
tube development (GO:0035295)	858	25	6.96	+	3.59	4.28e-08	6.73e-05
vasculature development (GO:0001944)	515	15	4.18	+	3.59	2.61e-05	0.00775
tube morphogenesis (GO:0035239)	655	19	5.31	+	3.58	2.2e-06	0.00108
supramolecular fiber organization (GO:0097435)	518	15	4.2	+	3.57	2.78e-05	0.00782
positive regulation of cell migration (GO:0030335)	522	15	4.23	+	3.54	3.03e-05	0.00823
positive regulation of programmed cell death (GO:0043068)	524	15	4.25	+	3.53	3.17e-05	0.00844
enzyme linked receptor protein signaling pathway (GO:0007167)	597	17	4.84	+	3.51	9.83e-06	0.00329
negative regulation of intracellular signal transduction (GO:1902532)	494	14	4.01	+	3.49	6.5e-05	0.0146
positive regulation of apoptotic process (GO:0043065)	509	14	4.13	+	3.39	8.85e-05	0.0183
positive regulation of cell motility (GO:2000147)	547	15	4.44	+	3.38	5.09e-05	0.0121
cell adhesion (GO:0007155)	952	26	7.72	+	3.37	7.78e-08	0.000102
negative regulation of multicellular organismal process (GO:0051241)	991	27	8.04	+	3.36	4.43e-08	6.34e-05
circulatory system development (GO:0072359)	881	24	7.14	+	3.36	2.73e-07	0.000253
biological adhesion (GO:0022610)	958	26	7.77	+	3.35	8.77e-08	0.000106
regulation of cell migration (GO:0030334)	896	24	7.27	+	3.3	3.67e-07	0.000304
positive regulation of locomotion (GO:0040017)	562	15	4.56	+	3.29	6.85e-05	0.0152
actin cytoskeleton organization (GO:0030036)	532	14	4.31	+	3.25	0.000139	0.024
regulation of cellular component movement (GO:0051270)	1027	27	8.33	+	3.24	8.99e-08	0.000101
heart development (GO:0007507)	538	14	4.36	+	3.21	0.000156	0.0261
positive regulation of cell death (GO:0010942)	587	15	4.76	+	3.15	0.00011	0.0208
regulation of multicellular organismal development (GO:2000026)	1296	33	10.51	+	3.14	5.55e-09	2.91e-05
actin filament-based process (GO:0030029)	593	15	4.81	+	3.12	0.000122	0.0221
regulation of cell motility (GO:2000145)	952	24	7.72	+	3.11	1.05e-06	0.000753
regulation of cellular response to stress (GO:0080135)	639	16	5.18	+	3.09	8.1e-05	0.017
animal organ morphogenesis (GO:0009887)	961	24	7.79	+	3.08	1.24e-06	0.000846
regulation of locomotion (GO:0040012)	992	24	8.04	+	2.98	2.12e-06	0.00108
regulation of cell population proliferation (GO:0042127)	1654	40	13.41	+	2.98	3.98e-10	6.26e-06
regulation of anatomical structure morphogenesis (GO:0022603)	910	22	7.38	+	2.98	5.96e-06	0.00213
negative regulation of catalytic activity (GO:0043086)	766	18	6.21	+	2.9	6.36e-05	0.0145
positive regulation of cell population proliferation (GO:0008284)	939	22	7.61	+	2.89	9.64e-06	0.0033
negative regulation of signal transduction (GO:0009968)	1197	27	9.71	+	2.78	1.68e-06	0.00106
negative regulation of cell communication (GO:0010648)	1294	28	10.49	+	2.67	2.32e-06	0.0011
negative regulation of signaling (GO:0023057)	1298	28	10.53	+	2.66	2.46e-06	0.00114
anatomical structure formation involved in morphogenesis (GO:0048646)	888	19	7.2	+	2.64	0.000132	0.0233
regulation of transferase activity (GO:0051338)	879	18	7.13	+	2.53	0.000336	0.0441
negative regulation of molecular function (GO:0044092)	1130	23	9.16	+	2.51	5.23e-05	0.0123
anatomical structure morphogenesis (GO:0009653)	2138	43	17.34	+	2.48	2.65e-08	5.95e-05
regulation of developmental process (GO:0050793)	2374	47	19.25	+	2.44	6.04e-09	1.9e-05
cytoskeleton organization (GO:0007010)	1165	23	9.45	+	2.43	0.000133	0.0233
regulation of phosphorylation (GO:0042325)	1237	24	10.03	+	2.39	0.000101	0.0205
negative regulation of response to stimulus (GO:0048585)	1555	29	12.61	+	2.3	2.62e-05	0.00763
regulation of multicellular organismal process (GO:0051239)	2582	48	20.94	+	2.29	2.76e-08	5.44e-05
regulation of phosphate metabolic process (GO:0019220)	1380	25	11.19	+	2.23	0.000158	0.0259
regulation of phosphorus metabolic process (GO:0051174)	1380	25	11.19	+	2.23	0.000158	0.0256
regulation of programmed cell death (GO:0043067)	1456	26	11.81	+	2.2	0.000193	0.0298
regulation of apoptotic process (GO:0042981)	1426	25	11.56	+	2.16	0.000318	0.0425
tissue development (GO:0009888)	1600	28	12.97	+	2.16	0.00012	0.022
regulation of cell differentiation (GO:0045595)	1496	26	12.13	+	2.14	0.00025	0.0357
regulation of catalytic activity (GO:0050790)	2372	41	19.23	+	2.13	2.55e-06	0.00112
regulation of cell death (GO:0010941)	1593	27	12.92	+	2.09	0.000372	0.0469
regulation of molecular function (GO:0065009)	3065	49	24.85	+	1.97	1.91e-06	0.00107
animal organ development (GO:0048513)	3080	49	24.97	+	1.96	2.12e-06	0.00111
regulation of cell communication (GO:0010646)	3230	50	26.19	+	1.91	5.14e-06	0.00192
regulation of signal transduction (GO:0009966)	2855	44	23.15	+	1.9	2.42e-05	0.00733
regulation of signaling (GO:0023051)	3245	50	26.31	+	1.9	5.36e-06	0.00196
negative regulation of biological process (GO:0048519)	5181	77	42.01	+	1.83	5.58e-09	2.2e-05
system development (GO:0048731)	4174	62	33.85	+	1.83	5.7e-07	0.000448
regulation of localization (GO:0032879)	2711	40	21.98	+	1.82	0.000197	0.0299
negative regulation of cellular process (GO:0048523)	4778	70	38.74	+	1.81	9.94e-08	0.000104
multicellular organism development (GO:0007275)	4528	64	36.72	+	1.74	2.06e-06	0.00112
regulation of biological quality (GO:0065008)	3796	52	30.78	+	1.69	8.09e-05	0.0172
positive regulation of macromolecule metabolic process (GO:0010604)	3384	46	27.44	+	1.68	0.000325	0.043
signal transduction (GO:0007165)	4720	63	38.27	+	1.65	1.81e-05	0.00559
regulation of response to stimulus (GO:0048583)	3785	50	30.69	+	1.63	0.000284	0.0386
anatomical structure development (GO:0048856)	5003	65	40.57	+	1.6	3.88e-05	0.00986
signaling (GO:0023052)	5057	65	41.01	+	1.59	4.32e-05	0.0104
cell communication (GO:0007154)	5160	65	41.84	+	1.55	0.000102	0.0203
developmental process (GO:0032502)	5567	70	45.14	+	1.55	3.53e-05	0.00925
positive regulation of cellular process (GO:0048522)	5584	68	45.28	+	1.5	0.000157	0.0261
positive regulation of biological process (GO:0048518)	6064	73	49.17	+	1.48	0.000113	0.0208
cellular response to stimulus (GO:0051716)	6376	75	51.7	+	1.45	0.000198	0.0297
regulation of metabolic process (GO:0019222)	6587	77	53.41	+	1.44	0.000164	0.0263
regulation of biological process (GO:0050789)	11523	121	93.44	+	1.29	1.44e-05	0.00462
regulation of cellular process (GO:0050794)	11068	114	89.75	+	1.27	0.000169	0.0266
biological regulation (GO:0065007)	12253	124	99.36	+	1.25	9.35e-05	0.0191

## Sheet: GO reactome Down
Analysis Type:	PANTHER Overrepresentation Test (Released 20210224)
Annotation Version and Release Date:	Reactome version 65 Released 2020-11-17
Analyzed List:	upload_1 (Homo sapiens)
Reference List:	Homo sapiens (all genes in database)
Test Type:	FISHER
Correction:	FDR
Reactome pathways	Homo sapiens - REFLIST (20595)	upload_1 (167)	upload_1 (expected)	upload_1 (over/under)	upload_1 (fold Enrichment)	upload_1 (raw P-value)	upload_1 (FDR)
Elastic fibre formation (R-HSA-1566948)	45	7	0.36	+	19.18	1.89e-07	0.000433
Molecules associated with elastic fibres (R-HSA-2129379)	38	5	0.31	+	16.23	2.38e-05	0.0181
Extracellular matrix organization (R-HSA-1474244)	299	13	2.42	+	5.36	1.53e-06	0.00175
